# Supplementary material
Source: MDPI journal article supplement (https://www.mdpi.com/2227-9717/4/2/10)
Supplement: s1 [file s1]

Supplementary Material: A Dynamic Optimization Model for Designing Open-Channel Raceway Ponds for Batch Production of Algal Biomass

Soumya Yadala and Selen Cremaschi

Equations (1) through (22) are supplementary material, provided to show the calculations of incident irradiance (*Io*). All the supporting parameters depend on location (latitude, longitude and time zone) and are calculated using the model developed by NOAA Solar Calculations

| *JulianDay* |  |
| --- | --- |
| *JulianCentury* |  |
| *geomMeanLongSun* |  |
| *geoMeanAnomSun* |  |
| *eccentEarthOrbit* |  |
| *sunTrueLong* |  |
| *sunTrueAnom* |  |
| *sunRadVector* |  |
| *sunAppLong* |  |
| *meanObliqEcliptic* |  |
| *obliqCorr* |  |
| *sunRtAscen* |  |
| *sunDeclin* |  |
| *varY* |  |
| *eqofTime* |  |
| *haSunrise* |  |
| *solarNoon* |  |
| *sunriseTime* | Time of sunrise |
| *hourangle* | Hour angle |
| *declination* | Declination angle (degrees) |
| *θ* | Zenith angle (degrees) |
| *It* | Extraterrestrial solar radiation on a horizon surface (muE per square meter per sec) |
| *Io* | Incident solar radiation on horizontal surface (muE per square meter per sec) |
| *Tsurr* | Surrounding temperature at a location |

When day of the year, time of the day, and time zone of a location are given, Equation (19) calculates the sunrise time while Equation (22) calculates the zenith angle at a location.

𝑗𝑢𝑙𝑖𝑎𝑛𝐷𝑎𝑦*l,d,t*=𝑑𝑎𝑡𝑒+2415018.5+𝑡𝑖𝑚𝑒−(𝑇𝑖𝑚𝑒𝑧𝑜𝑛𝑒/24) (1)

𝑗𝑢𝑙𝑖𝑎𝑛𝐶𝑒𝑛𝑡𝑢𝑟𝑦*l,d,t*=(𝑗𝑢𝑙𝑖𝑎𝑛𝐷𝑎𝑦𝑙,𝑑,𝑡−2451545)/36525 (2)

𝑔𝑒𝑜𝑀𝑒𝑎𝑛𝐿𝑜𝑛𝑔𝑆𝑢𝑛*l,d,t*=𝑀𝑂𝐷[280.46646+𝑗𝑢𝑙𝑖𝑎𝑛𝐶𝑒𝑛𝑡𝑢𝑟𝑦𝑙,𝑑,𝑡∗(36000.76983+𝑗𝑢𝑙𝑖𝑎𝑛𝐶𝑒𝑛𝑡𝑢𝑟𝑦𝑙,𝑑,𝑡∗0.0003032),
360] (3)

𝑔𝑒𝑜𝑀𝑒𝑎𝑛𝐴𝑛𝑜𝑚𝑆𝑢𝑛*l,d,t*=357.52911+𝑗𝑢𝑙𝑖𝑎𝑛𝐶𝑒𝑛𝑡𝑢𝑟𝑦𝑙,𝑑,𝑡∗(35999.05029−0.0001537∗𝑗𝑢𝑙𝑖𝑎𝑛𝐶𝑒𝑛𝑡𝑢𝑟𝑦𝑙,𝑑,𝑡) (4)

𝑒𝑐𝑐𝑒𝑛𝑡𝐸𝑎𝑟𝑡h𝑂𝑟𝑏𝑖𝑡*l,d,t*=0.016708634−𝑗𝑢𝑙𝑖𝑎𝑛𝐶𝑒𝑛𝑡𝑢𝑟𝑦𝑙,𝑑,𝑡∗(0.000042037+0.0001537∗𝑗𝑢𝑙𝑖𝑎𝑛𝐶𝑒𝑛𝑡𝑢𝑟𝑦𝑙,𝑑,𝑡) (5)

𝑠𝑢𝑛𝐸𝑞𝑜𝑓𝐶𝑡𝑟𝑙,𝑑,𝑡={sin[𝑔𝑒𝑜𝑚𝑀𝑒𝑎𝑛𝐴𝑛𝑜𝑚𝑆𝑢𝑛𝑙,𝑑,𝑡]∗[1.914602−𝑗𝑢𝑙𝑖𝑎𝑛𝐶𝑒𝑛𝑡𝑢𝑟𝑦𝑙,𝑑,𝑡∗(0.004817+0.000014∗𝑗𝑢𝑙𝑖𝑎𝑛𝐶𝑒𝑛𝑡𝑢𝑟𝑦𝑙,𝑑,𝑡)]}+{sin[2∗𝑔𝑒𝑜𝑚𝑀𝑒𝑎𝑛𝐴𝑛𝑜𝑚𝑆𝑢𝑛𝑙,𝑑,𝑡]∗(0.019993−0.000101∗𝑗𝑢𝑙𝑖𝑎𝑛𝐶𝑒𝑛𝑡𝑢𝑟𝑦𝑙,𝑑,𝑡)}+{sin[3∗𝑔𝑒𝑜𝑚𝑀𝑒𝑎𝑛𝐴𝑛𝑜𝑚𝑆𝑢𝑛𝑙,𝑑,𝑡]∗0.000289} (6)

𝑠𝑢𝑛𝑇𝑟𝑢𝑒𝐿𝑜𝑛𝑔𝑙,,=𝑔𝑒𝑜𝑚𝑀𝑒𝑎𝑛𝐿𝑜𝑛𝑔𝑆𝑢𝑛𝑙,𝑑,𝑡+𝑠𝑢𝑛𝐸𝑞𝑜𝑓𝐶𝑡𝑟𝑙,𝑑,𝑡 (7)

𝑠𝑢𝑛𝑇𝑟𝑢𝑒𝐴𝑛𝑜𝑚*l,d,t*=𝑔𝑒𝑜𝑚𝑀𝑒𝑎𝑛𝐴𝑛𝑜𝑚𝑆𝑢𝑛𝑙,𝑑,𝑡+𝑠𝑢𝑛𝐸𝑞𝑜𝑓𝐶𝑡𝑟𝑙,𝑑,𝑡 (8)

𝑠𝑢𝑛𝑅𝑎𝑑𝑉𝑒𝑐𝑡𝑜𝑟𝑙,𝑑,𝑡=(1.000001018∗(1−𝑒𝑐𝑐𝑒𝑛𝑡𝐸𝑎𝑟𝑡ℎ𝑂𝑟𝑏𝑖𝑡𝑙,𝑑,𝑡∗𝑒𝑐𝑐𝑒𝑛𝑡𝐸𝑎𝑟𝑡ℎ𝑂𝑟𝑏𝑖𝑡𝑙,𝑑,𝑡))/(1+𝑒𝑐𝑐𝑒𝑛𝑡𝐸𝑎𝑟𝑡ℎ𝑂𝑟𝑏𝑖𝑡𝑙,𝑑,𝑡∗cos(𝑠𝑢𝑛𝑇𝑟𝑢𝑒𝐴𝑛𝑜𝑚𝑙,𝑑,𝑡)) (9)

𝑠𝑢𝑛𝐴𝑝𝑝𝐿𝑜𝑛𝑔*l,d,t*=𝑠𝑢𝑛𝑇𝑟𝑢𝑒𝐿𝑜𝑛𝑔𝑙,𝑑,𝑡−0.00569−0.00478∗sin(125.04−1934.136∗𝑗𝑢𝑙𝑖𝑎𝑛𝐶𝑒𝑛𝑡𝑢𝑟𝑦𝑙,𝑑,𝑡) (10)

𝑚𝑒𝑎𝑛𝑂𝑏𝑙𝑖𝑞𝐸𝑐𝑙𝑖𝑝𝑡𝑖𝑐𝑙,𝑑,𝑡=23+[26+(21.448−𝑗𝑢𝑙𝑖𝑎𝑛𝐶𝑒𝑛𝑡𝑢𝑟𝑦𝑙,𝑑,𝑡∗(46.815+𝑗𝑢𝑙𝑖𝑎𝑛𝐶𝑒𝑛𝑡𝑢𝑟𝑦𝑙,𝑑,𝑡∗(0.00059−𝑗𝑢𝑙𝑖𝑎𝑛𝐶𝑒𝑛𝑡𝑢𝑟𝑦𝑙,𝑑,𝑡∗0.001813))60)/60] (11)

𝑜𝑏𝑙𝑖𝑞𝐶𝑜𝑟𝑟*l,d,t*=𝑚𝑒𝑎𝑛𝑂𝑏𝑙𝑖𝑞𝐸𝑐𝑙𝑖𝑝𝑡𝑖𝑐𝑙,𝑑,𝑡+0.00256∗cos(125.04−1934.136∗𝑗𝑢𝑙𝑖𝑎𝑛𝐶𝑒𝑛𝑡𝑢𝑟𝑦𝑙,𝑑,𝑡) (12)

𝑠𝑢𝑛𝑅𝑡𝐴𝑠𝑐𝑒𝑛𝑙,𝑑,𝑡=𝑎𝑟𝑐𝑡𝑎𝑛2[cos(𝑜𝑏𝑙𝑖𝑞𝐶𝑜𝑟𝑟𝑙,𝑑,𝑡)∗sin(𝑠𝑢𝑛𝐴𝑝𝑝𝐿𝑜𝑛𝑔𝑙,𝑑,𝑡),cos(𝑠𝑢𝑛𝐴𝑝𝑝𝐿𝑜𝑛𝑔𝑙,𝑑,𝑡)] (13)

𝑠𝑢𝑛𝐷𝑒𝑐𝑙𝑖𝑛𝑙,𝑑,𝑡=sin−1[sin(𝑜𝑏𝑙𝑖𝑞𝐶𝑜𝑟𝑟𝑙,𝑑,𝑡)∗sin(𝑠𝑢𝑛𝐴𝑝𝑝𝐿𝑜𝑛𝑔𝑙,𝑑,𝑡)] (14)

𝑣𝑎𝑟𝑌*l,d,t*=tan[𝑜𝑏𝑙𝑖𝑞𝐶𝑜𝑟𝑟𝑙,𝑑,𝑡/2]∗tan[𝑜𝑏𝑙𝑖𝑞𝐶𝑜𝑟𝑟𝑙,𝑑,𝑡/2] (15)

𝑒𝑞𝑜𝑓𝑇𝑖𝑚𝑒𝑙,𝑑,𝑡=4∗{𝑣𝑎𝑟𝑌𝑙,𝑑,𝑡∗sin[2∗(𝑔𝑒𝑜𝑚𝑀𝑒𝑎𝑛𝐿𝑜𝑛𝑔𝑆𝑢𝑛𝑙,𝑑,𝑡)]−2∗𝑒𝑐𝑐𝑒𝑛𝑡𝐸𝑎𝑟𝑡ℎ𝑂𝑟𝑏𝑖𝑡𝑙,𝑑,𝑡∗sin[𝑔𝑒𝑜𝑚𝑀𝑒𝑎𝑛𝐴𝑛𝑜𝑚𝑆𝑢𝑛𝑙,𝑑,𝑡]+4∗𝑒𝑐𝑐𝑒𝑛𝑡𝐸𝑎𝑟𝑡ℎ𝑂𝑟𝑏𝑖𝑡𝑙,𝑑,𝑡∗𝑣𝑎𝑟𝑌𝑙,𝑑,𝑡∗sin[𝑔𝑒𝑜𝑚𝑀𝑒𝑎𝑛𝐴𝑛𝑜𝑚𝑆𝑢𝑛𝑙,𝑑,𝑡]∗cos[2∗(𝑔𝑒𝑜𝑚𝑀𝑒𝑎𝑛𝐿𝑜𝑛𝑔𝑆𝑢𝑛𝑙,𝑑,𝑡)]−0.5∗𝑣𝑎𝑟𝑌𝑙,𝑑,𝑡∗𝑣𝑎𝑟𝑌𝑙,𝑑,𝑡∗sin[4∗(𝑔𝑒𝑜𝑚𝑀𝑒𝑎𝑛𝐿𝑜𝑛𝑔𝑆𝑢𝑛𝑙,𝑑,𝑡)]−1.25∗𝑒𝑐𝑐𝑒𝑛𝑡𝐸𝑎𝑟𝑡ℎ𝑂𝑟𝑏𝑖𝑡𝑙,𝑑,𝑡∗𝑒𝑐𝑐𝑒𝑛𝑡𝐸𝑎𝑟𝑡ℎ𝑂𝑟𝑏𝑖𝑡𝑙,𝑑,𝑡∗sin[2∗(𝑔𝑒𝑜𝑚𝑀𝑒𝑎𝑛𝐴𝑛𝑜𝑚𝑆𝑢𝑛𝑙,𝑑,𝑡)]} (16)

ℎ𝑎𝑆𝑢𝑛𝑟𝑖𝑠𝑒𝑙,𝑑,𝑡=cos−1[(cos(90.833)/cos(𝑙𝑎𝑡𝑖𝑡𝑢𝑑𝑒𝑙∗cos(𝑠𝑢𝑛𝐷𝑒𝑐𝑙𝑖𝑛𝑙,𝑑,𝑡))−tan(𝑙𝑎𝑡𝑖𝑡𝑢𝑑𝑒𝑙)∗tan(𝑠𝑢𝑛𝐷𝑒𝑐𝑙𝑖𝑛𝑙,𝑑,𝑡)] (17)

𝑠𝑜𝑙𝑎𝑟𝑁𝑜𝑜𝑛*l,d,t*=(720−(4∗𝑙𝑜𝑛𝑔𝑖𝑡𝑢𝑑𝑒𝑙)−𝑒𝑞𝑜𝑓𝑇𝑖𝑚𝑒𝑙,𝑑,𝑡+(𝑡𝑖𝑚𝑒𝑍𝑜𝑛𝑒𝑙∗60))/1440 (18)

𝑠𝑢𝑛𝑟𝑖𝑠𝑒𝑇𝑖𝑚𝑒*l,d,t*=(𝑠𝑜𝑙𝑎𝑟𝑁𝑜𝑜𝑛𝑙,𝑑,𝑡−(ℎ𝑎𝑆𝑢𝑛𝑟𝑖𝑠𝑒𝑙,𝑑,𝑡∗4))/1440 (19)

ℎ𝑜𝑢𝑟𝐴𝑛𝑔𝑙𝑒𝑡=15∗(12−𝑡𝑖𝑚𝑒) (20)

𝑑𝑒𝑐𝑙𝑖𝑛𝑎𝑡𝑖𝑜𝑛𝑑=23.45∗sin[(360∗(284+𝑑𝑎𝑡𝑒))/365] (21)

𝜃𝑙,𝑑,𝑡=cos−1[sin(𝑑𝑒𝑐𝑙𝑖𝑛𝑎𝑡𝑖𝑜𝑛𝑑)∗sin(𝐿𝑎𝑡𝑖𝑡𝑢𝑑𝑒𝑙)+cos(𝑑𝑒𝑐𝑙𝑖𝑛𝑎𝑡𝑖𝑜𝑛𝑑)∗cos(𝐿𝑎𝑡𝑖𝑡𝑢𝑑𝑒𝑙)∗cos(h𝑜𝑢𝑟𝐴𝑛𝑔𝑙𝑒𝑡)] (22)

Extraterrestrial solar radiation available at a location (Equation (23)) is based on the models presented in [[1](#_bookmark0)]. These correlations were developed and validated by Maxwell [[2](#_bookmark1)] to estimate the hourly profile of irradiance and are widely accepted and considered to be relatively “universal”. The model was validated using data from four locations at widely varying latitudes with significantly different climates and comparing these measurements with existing models. Their results show that their model performs better without compensating for seasonal, climatic, or geographic differences. Incident solar radiation is estimated (Equation (24)) based on the empirical correlation presented by Hargreaves in [[3](#_bookmark2)]. The empirical model was developed using available meteorological observations.

𝐼𝑡*d,t*=𝑆𝑐∗cos𝜃𝑑,𝑡 ∀𝑑,∀𝑡 (23)

𝐼𝑜*d,t*=𝐸𝑚𝑝𝐴∗√(𝑇𝑚𝑎𝑥𝑑−𝑇𝑚𝑖𝑛𝑑)∗𝐼𝑡𝑑,𝑡 ∀𝑑,∀𝑡 (24)

Temperature simulation model presented in [[4](#_bookmark3)], and given in Equations (25)–(27), is used to calculate the surrounding temperature, 𝑇𝑠𝑢𝑟𝑟𝑑, on day *d* at time *t* on earth surface. This model is validated by Berninger [[5](#_bookmark4)] in his study by comparing the simulated data and the instantaneous measured data on a sample day for a period of 45 days. The results indicated that the model was a good fit to the instantaneous temperature measurements. The model assumes that minimum temperature, 𝑇𝑚𝑖𝑛𝑑, occurs at the time of sunrise and maximum temperature, 𝑇𝑚ax𝑑 at 14:00 h. Equation (25) calculates the surrounding temperature before the time of sunrise, *sunriseTimed*. Equation (26) calculates the surrounding temperature between sunrise time and time when maximum temperature occurs, *i.e.*, 14:00 h. Equation (27) calculates the surrounding temperature after the time when maximum temperature occurs.

𝑇𝑠𝑢𝑟𝑟*d,t*=(𝑇𝑚𝑎𝑥𝑑+𝑇𝑚𝑖𝑛𝑑)/2+(𝑇𝑚𝑎𝑥𝑑−𝑇𝑚𝑖𝑛𝑑)/2∗cos[(180∗(𝑡+10))/(10+𝑠𝑢𝑛𝑟𝑖𝑠𝑒𝑇𝑖𝑚𝑒𝑑)] ∀ 𝑡 𝑖𝑓 𝑡<𝑠𝑢𝑛𝑟𝑖𝑠𝑒𝑇𝑖𝑚𝑒𝑑,∀𝑑 (25)

𝑇𝑠𝑢𝑟𝑟*d,t*=(𝑇𝑚𝑎𝑥𝑑+𝑇𝑚𝑖𝑛𝑑)/2−(𝑇𝑚𝑎𝑥𝑑−𝑇𝑚𝑖𝑛𝑑)/2∗cos[(180∗(𝑡−𝑠𝑢𝑛𝑟𝑖𝑠𝑒𝑇𝑖𝑚𝑒𝑑))/(14−𝑠𝑢𝑛𝑟𝑖𝑠𝑒𝑇𝑖𝑚𝑒𝑑)] ∀𝑡 𝑖𝑓 𝑠𝑢𝑛𝑟𝑖𝑠𝑒𝑇𝑖𝑚𝑒𝑑≤𝑡≤14 ℎ𝑜𝑢𝑟𝑠,∀𝑑 (26)

𝑇𝑠𝑢𝑟𝑟*d,t*=(𝑇𝑚𝑎𝑥𝑑+𝑇𝑚𝑖𝑛𝑑)/2+(𝑇𝑚𝑎𝑥𝑑−𝑇𝑚𝑖𝑛𝑑)/2∗cos[(180∗(𝑡−14))/(10+𝑠𝑢𝑛𝑟𝑖𝑠𝑒𝑇𝑖𝑚𝑒𝑑)] ∀𝑡 𝑖𝑓𝑡>14 h,∀𝑑 (27)

References

1. Ebrahimpour, A.; Maerefat, M. A method for generation of typical meteorological year. *Energy Convers. Manag.* **2010**, *51*, 410–417.
2. Maxwell, E.L. *A Quasi-Physical Model for Converting Hourly Global Horizontal to Direct Normal Insolation*; Solar Energy Research Inst.: Golden, CO, USA, 1987.
3. Hargreaves, G. Responding to tropical climates. *Journal Abbreviation* **1980**, *81*, 29–32.
4. Woodhead, T. Simulation of assimilation, respiration and transpiration of crops. *Q. J. R. Meteorol. Soc.* **1979**, *105*, 728–729.
5. Berninger, F. Simulated irradiance and temperature estimates as a possible source of bias in the simulation of photosynthesis. *Agric. For. Meteorol.* **1994**, *71*, 19–32.
